# Supplementary material
Source: PubMed Central journal article supplement (PMC6302677)
Supplement: Supp_Fig2.pdf [file Supp_Fig2.pdf]

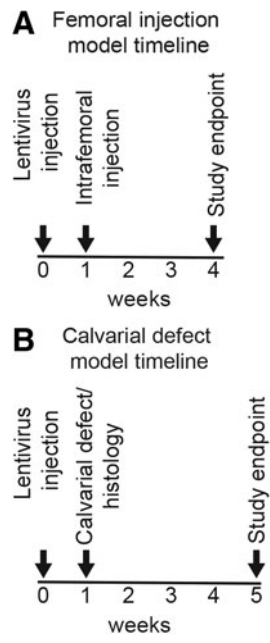

**SUPPLEMENTARY FIG. S2.** Time line of animal models, including (A) femoral injection and (B) calvarial defect injury model.
