# Supplementary material
Source: PubMed Central journal article supplement (PMC6302677)
Supplement: Supp_Fig4.pdf [file Supp_Fig4.pdf]

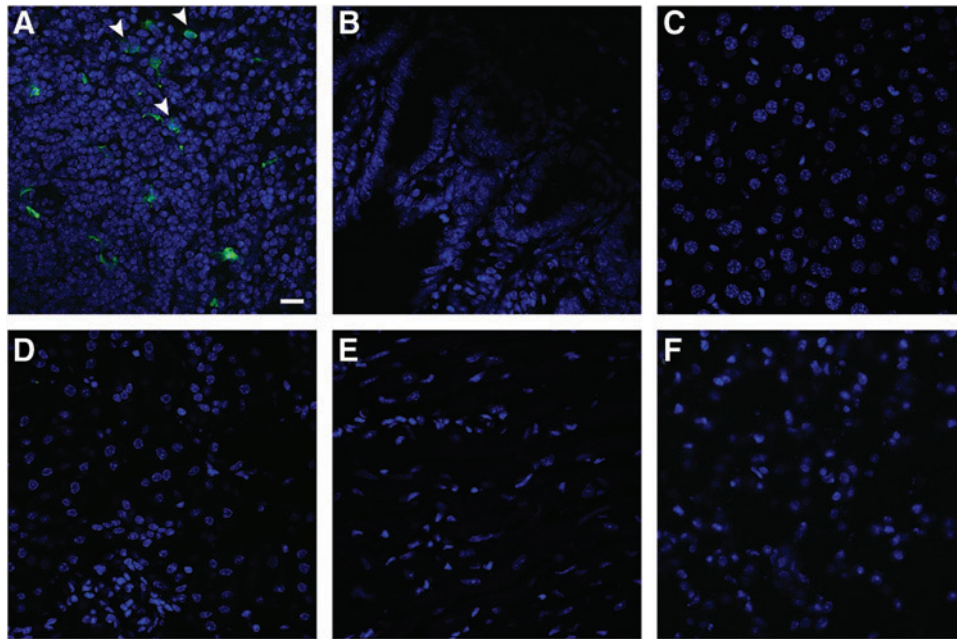

**SUPPLEMENTARY FIG. S4.** GFP expression in the visceral organs 4 weeks postlentiviral delivery. Survey of distant tissues for biological distribution of eGFP reporter activity postlentiviral injection to the calvaria. Data shown are of 4 weeks. Biodistribution at 8 weeks was the same. Arrowheads highlight reporter activity. eGFP reporter activity was only seen in scattered stromal cells of the spleen (A). Fluorescence was absent in all other tissues examined, including representative images of large intestine (B), liver (C), kidney (D), heart (E), and lung parenchyma (F). Other tissues and organs not shown were also negative for reporter activity, including stomach, small intestine, skin, subcutaneous adipose tissue, and long bones. Cells were counterstained with DAPI (*blue*). Scale bars: 20  $\mu$ m.
