# Supplementary material
Source: PubMed Central journal article supplement (PMC6302677)

# Supplementary Data

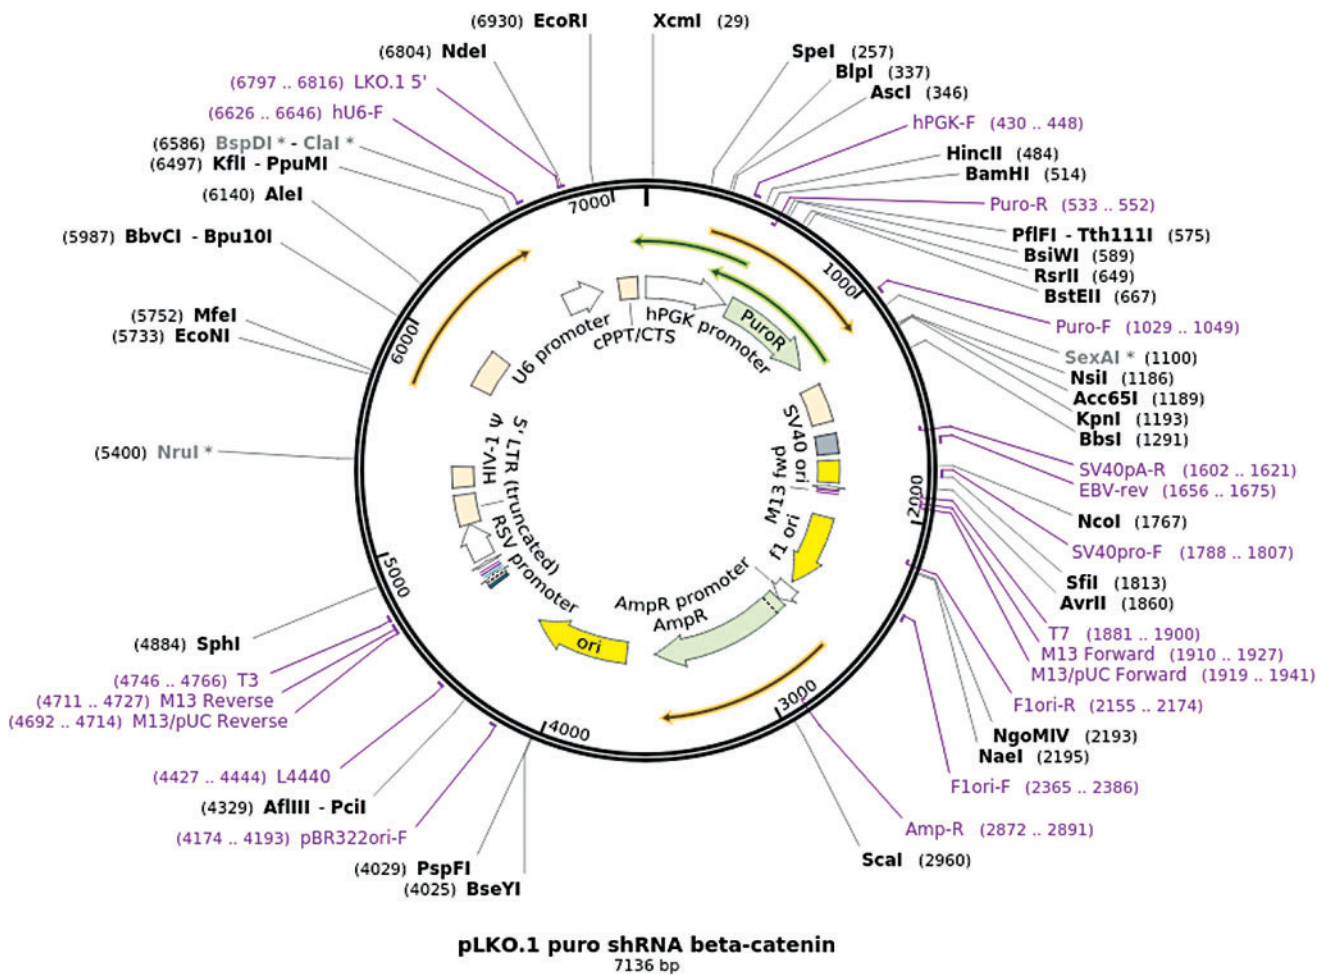

**SUPPLEMENTARY FIG. S1.** Structural map for lentiviral vector.

Supplement: Supp_Fig1.pdf [file Supp_Fig1.pdf]
